# Supplementary material for: Can Microneedle Fractional Radiofrequency System Treatment Impair the Skin Barrier Function in Chinese Patients? A Prospective Clinical Trial
Source: Springer Nature journal article supplement (doi:10.1007/s13555-022-00807-w), 2022-09-21
Supplement: MOESM1 [file 23522592]

**Can Microneedle Fractional Radiofrequency System Treatment impair the skin barrier function in Chinese Patients? A Prospective Clinical Trial**

**Xiujuan Wu1*, Zhen Zhang2*, Jian Zhu, Sheng Lu1, Chen Chen1, Xianglei Wu3＃, Xue Wang2＃, Zongfeng Zhao4＃**

1 Department of Dermatology, Shanghai Xuhui Central Hospital, Zhongshan-Xuhui Hospital, Fudan University, No.966, Huaihai Middale Road, Xuhui District, Shanghai 200031, China

2 Department of Dermatology, Shanghai Ninth People’s Hospital, Shanghai Jiao Tong University School of Medicine, No.639, Manufacturing Bureau Road, Huangpu District, Shanghai 200011, China

3 Department of Laser and Aesthetic Medicine, Shanghai Ninth People’s Hospital, Shanghai Jiao Tong University School of Medicine, No.639, Zhizaoju Road, Huangpu District, Shanghai 200011, China

4 Department of Scientific Research, Shanghai Xuhui Central Hospital, Zhongshan-Xuhui Hospital, Fudan University, No.966, Huaihai Middle Road, Shanghai 200031, China

*****These contributed equally to this work and should be considered as co-first authors.

**＃Corresponding Authors:**

**Zongfeng Zhao**, Department of Scientific Research, Shanghai Xuhui Central Hospital, Zhongshan-Xuhui Hospital, Fudan University, No.966, Huaihai Middle Road, Xuhui District, Shanghai 200031, China, sygao@shxh-centerlab.com

**Xue Wang**, Department of Dermatology, Shanghai Ninth People’s Hospital, Shanghai Jiao Tong University School of Medicine, No.639, Zhizaoju Road, Shanghai 200011, China, belongtogether@126.com

**Xianglei Wu，**Department of Laser and Aesthetic Medicine, Shanghai Ninth People’s Hospital, Shanghai Jiao Tong University School of Medicine, No.639, Zhizaoju Road, Huangpu District, Shanghai 200011, China,150392997@qq.com


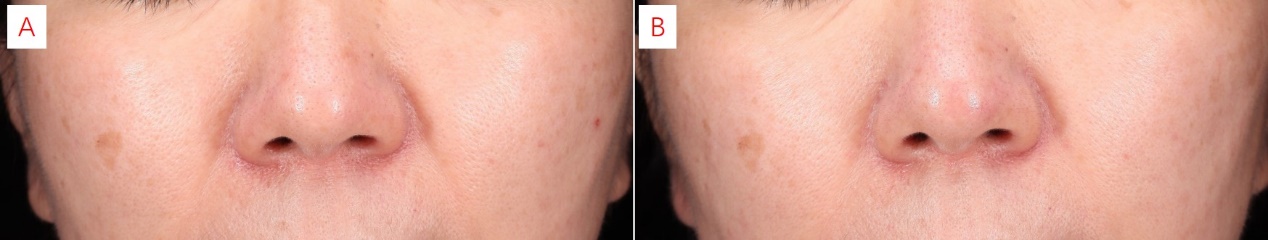


Supplement Figure 1: Improvement of facial enlarged pores before (a) and after (b) treatment.


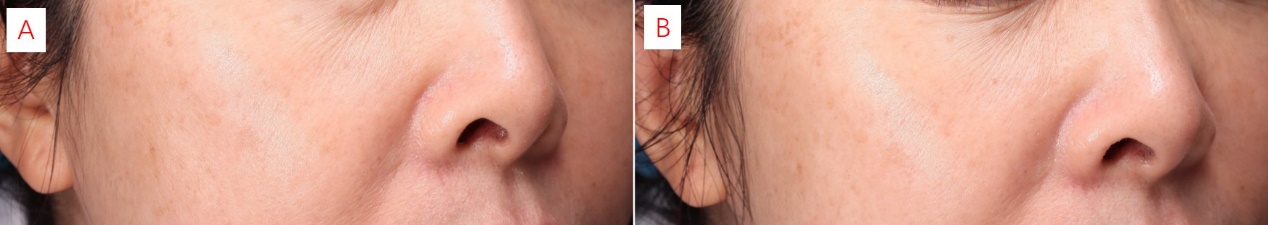


Supplement Figure 1: Photographs of facial skin laxity and photoaging before (a) and after (b) treatment.
